# Supplementary material for: Two ligand-functionalized Pb(ii) metal–organic frameworks: structures and catalytic performances
Source: Royal Society of Chemistry journal article supplement (doi:10.1039/c2dt30935a), 2012-01-01
Supplement: c2dt30935a.pdf [file c2dt30935a.pdf]

## Supporting Information

### Two Ligand-Functionalized Pb(II) Metal-Organic Frameworks: Structures and Catalytic Performance

Xiao-Ming Lin<sup>a</sup>, Ting Ting Li<sup>a</sup>, Lian Fen Chen<sup>a</sup>, Li Zhang<sup>\*a</sup> and Cheng-Yong Su<sup>\*a,b</sup>

<sup>a</sup> MOE Laboratory of Bioinorganic and Synthetic Chemistry/KLGHEI of Environment and Energy Chemistry, State Key Laboratory of Optoelectronic Materials and Technologies, School of Chemistry & Chemical Engineering, Sun Yat-Sen University, Guangzhou 510275, China. Fax: (+)86 20 8411-5178; E-mail: zhli99@mail.sysu.edu.cn, cecsy@mail.sysu.edu.cn

<sup>b</sup> State Key Laboratory of Applied Organic Chemistry, Lanzhou University, Lanzhou 730000, China.

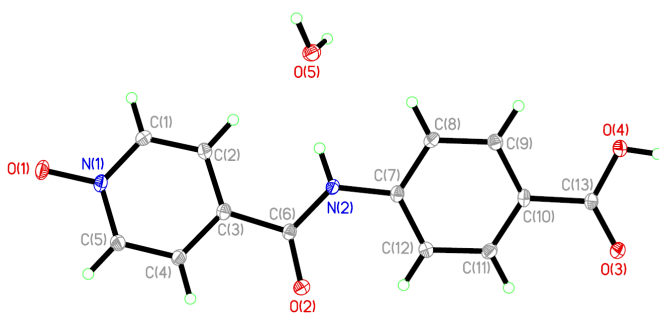

Figure S1. The molecule structure of ligand.

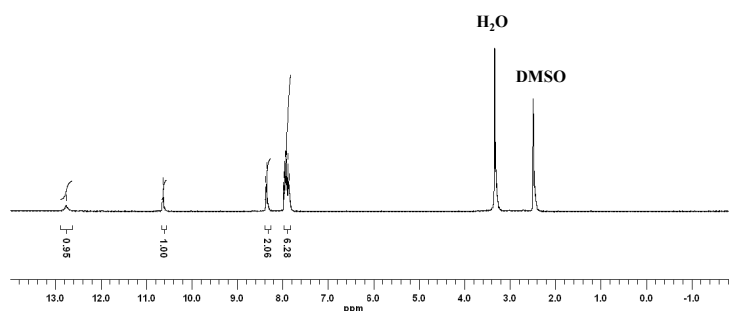

Figure S2. <sup>1</sup>H NMR (300 MHz, DMSO-*d*<sub>6</sub>) spectrum of the ligand.

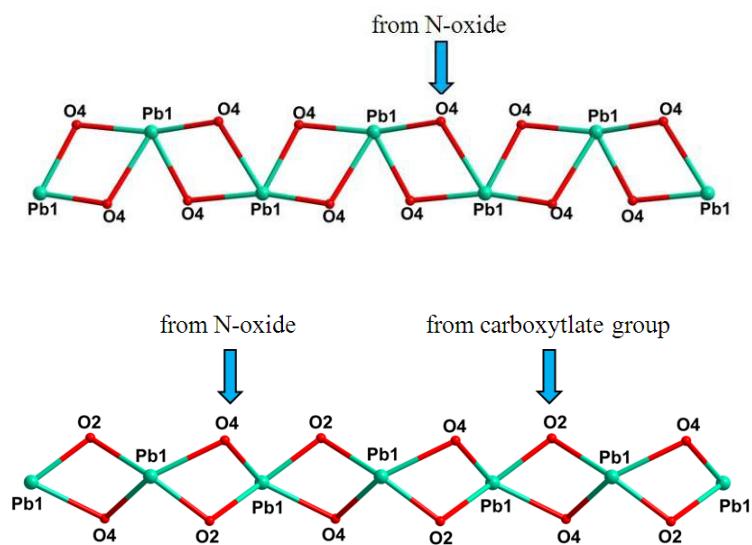

**Figure S3.**  $[\text{PbO}_2]_\infty$  chain connected by Pb atom and  $\mu_2$ -O atoms, showing the difference of the bridging O atoms of  $\text{Pb}_2\text{O}_2$  rings in **1** (top) and **2** (bottom), respectively.

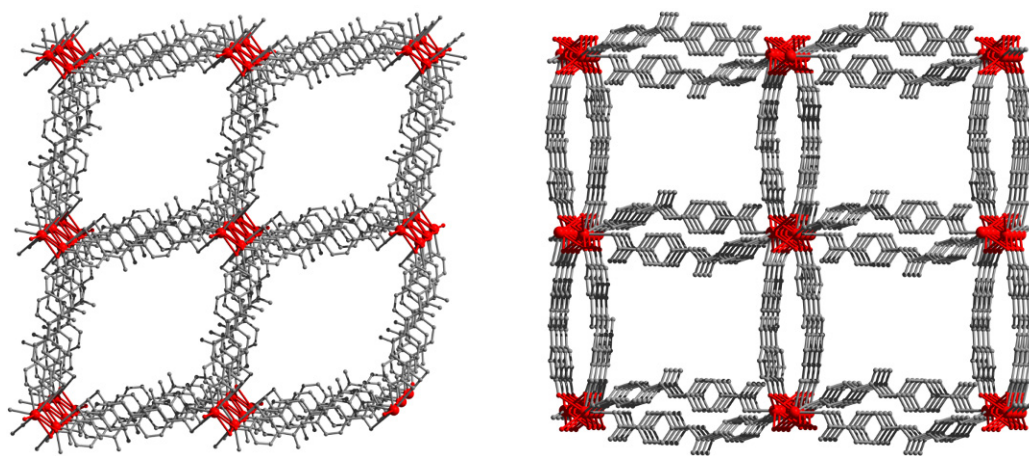

**Figure S4.** Illustration of the connection of  $[\text{PbO}_2]_\infty$  chains in **1** (left) and **2** (right) by the ligands. H atoms and solvent molecules are omitted for clarity.  $[\text{PbO}_2]_\infty$  chains and ligands are highlighted in red and gray colors, respectively.

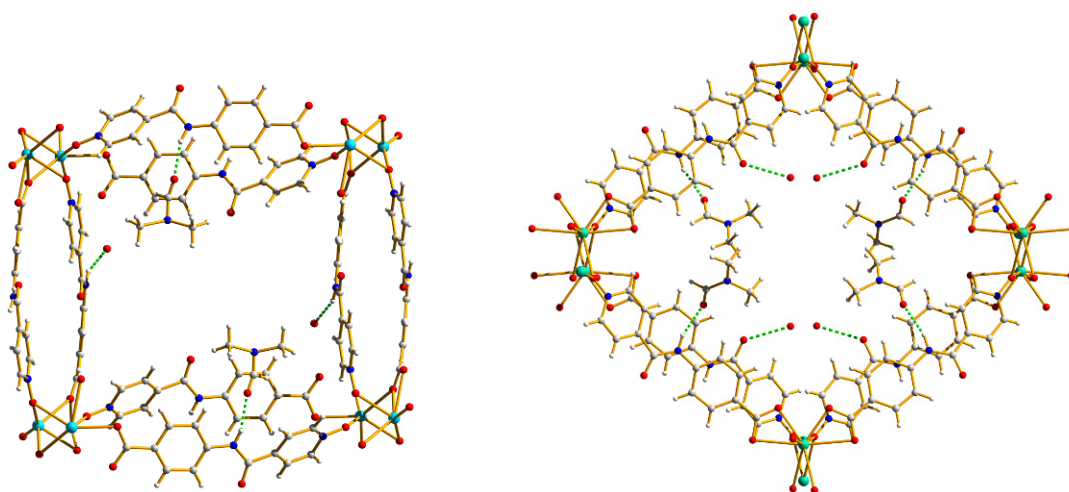

**Figure S5.** The hydrogen bonds (green dash lines) between the solvent molecules (DMF and water) and the amide groups in **1** (left) and **2** (right). Other solvent guest molecules that don't interact with the host are omitted for clarity.

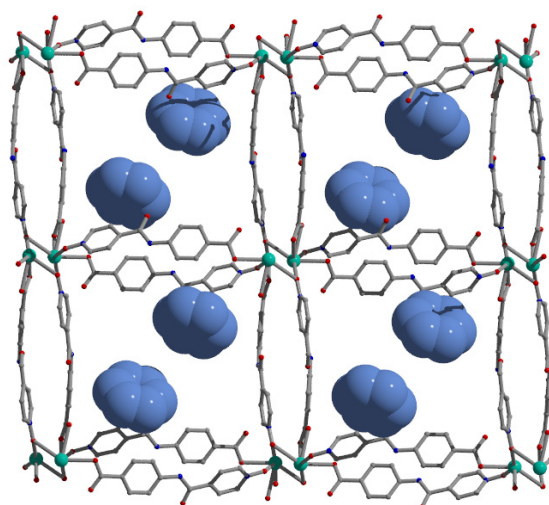

**Figure S6.** View of benzene guest molecules (shown in space-filling mode) hosted inside the 1D channels in **2'**. The coordination framework is shown in stick mode and H atoms are omitted for clarity.

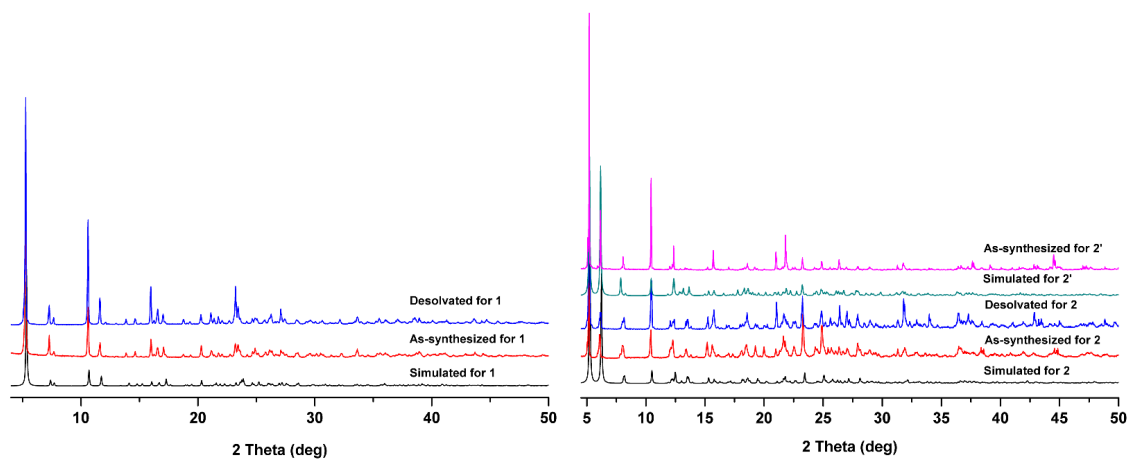

**Figure S7.** PXRD patterns of simulated, as-synthesized and desolvated **1** (left), **2** and **2'** (right).

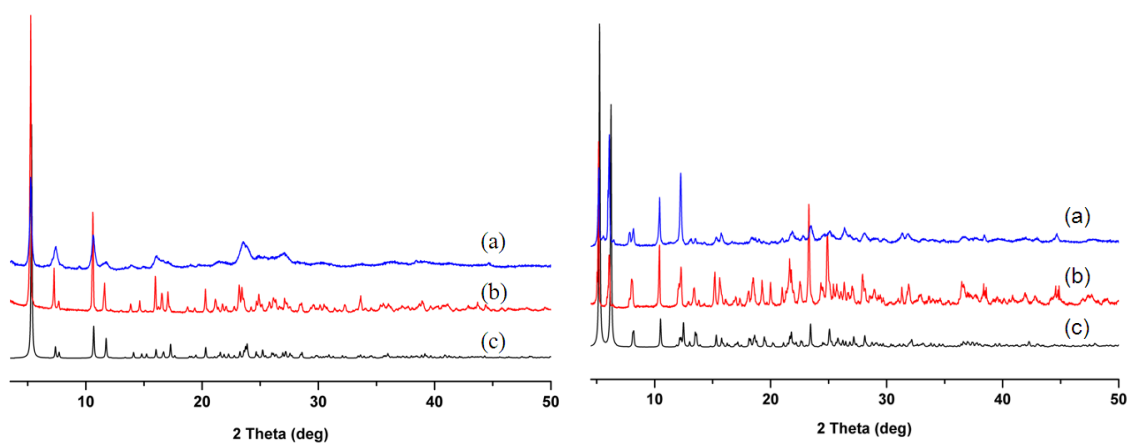

**Figure S8.** Powder X-ray diffraction patterns of **1** (left) and **2** (right): (a) after the catalytic reaction, (b) as-made, and (c) simulated from the X-ray crystal structure.

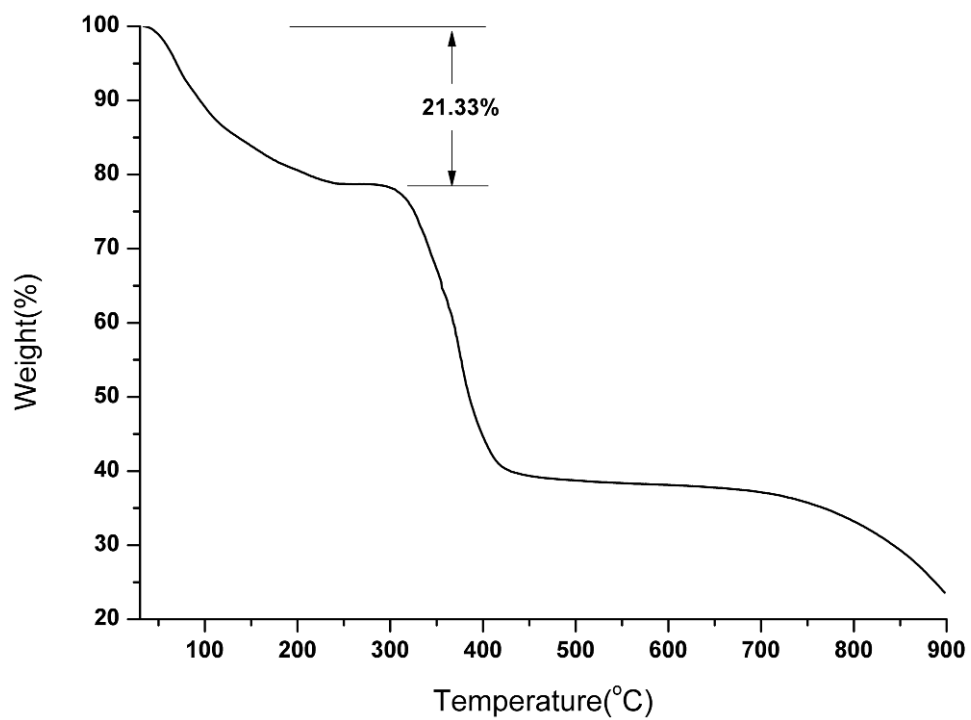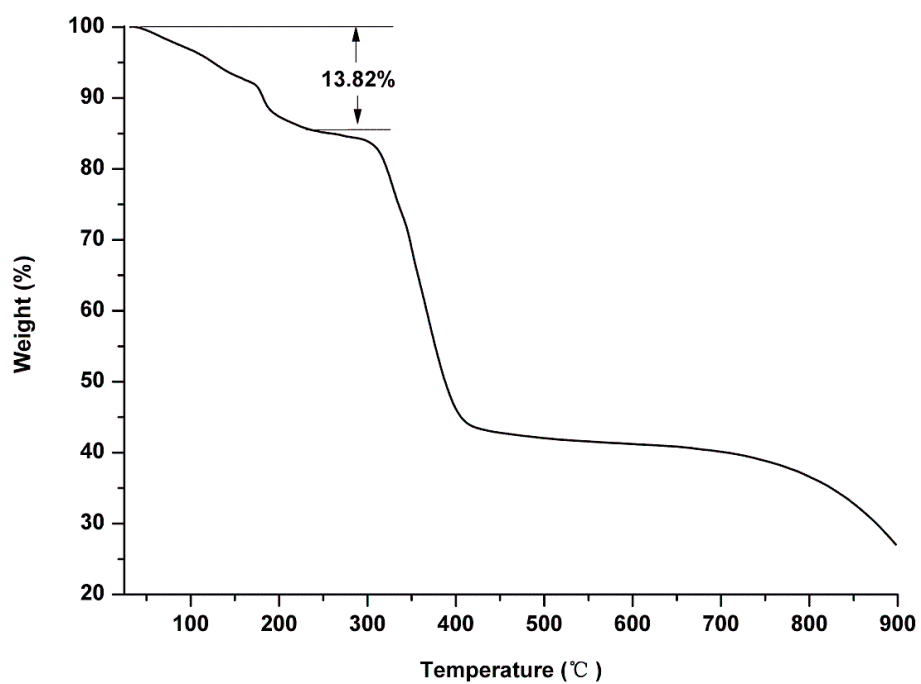

**Figure S9.** The TGA curves of **1** (top) and **2** (bottom).

**Table S1. Selected bond lengths (Å) and bond Angles (°) for 1, 2 and 2'.**

| <b>1</b>            |           | <b>2</b>          |          | <b>2'</b>         |            |
|---------------------|-----------|-------------------|----------|-------------------|------------|
| Pb(1)-O(2)#1        | 2.438(5)  | Pb(1)-O(5)#1      | 2.402(6) | Pb(1)-O(6)#1      | 2.423(3)   |
| Pb(1)-O(2)          | 2.438(5)  | Pb(1)-O(2)        | 2.468(7) | Pb(1)-O(1)        | 2.508(3)   |
| Pb(1)-O(4)#2        | 2.470(5)  | Pb(1)-O(1)        | 2.562(6) | Pb(1)-O(2)        | 2.556(3)   |
| Pb(1)-O(4)#3        | 2.470(5)  | Pb(1)-O(8)        | 2.616(7) | Pb(1)-O(8)        | 2.647 (3)  |
| O(2)#1-Pb(1)-O(2)   | 71.7(2)   | O(5)#1-Pb(1)-O(2) | 85.0(2)  | O(6)#1-Pb(1)-O(1) | 85.20(11)  |
| O(2)#1-Pb(1)-O(4)#2 | 83.68(17) | O(5)#1-Pb(1)-O(1) | 77.7(2)  | O(6)#1-Pb(1)-O(2) | 78.26(11)  |
| O(2)-Pb(1)-O(4)#2   | 82.77(17) | O(2)-Pb(1)-O(1)   | 51.5(2)  | O(1)-Pb(1)-O(2)   | 51.54(9)   |
| O(2)#1-Pb(1)-O(4)#3 | 82.77(17) | O(5)#1-Pb(1)-O(8) | 79.2(2)  | O(6)#1-Pb(1)-O(8) | 80.39(10)  |
| O(2)-Pb(1)-O(4)#3   | 83.68(17) | O(2)-Pb(1)-O(8)   | 127.9(2) | O(1)-Pb(1)-O(8)   | 128.63(10) |
| O(4)#2-Pb(1)-O(4)#3 | 163.3(2)  | O(1)-Pb(1)-O(8)   | 76.6(2)  | O(2)-Pb(1)-O(8)   | 77.23(9)   |

**Symmetry codes for 1:** #1 -x,y,-z+1/2, z+1/2, #2 x-1/2,-y+1/2,z+1/2, #3 -x+1/2,-y+1/2,-z; **2:** #1 -x+1,-y-2,-z+1 #2 x,-y-4,z-1/2 #3 x,-y-4,z+1/2; **3:** #1 -x,-y+3,-z
